# Supplementary material for: Patient freedom to choose a weight loss diet in the treatment of overweight and obesity: a randomized dietary intervention in type 2 diabetes and pre-diabetes
Source: PubMed Central journal article supplement (PMC4035903; doi:10.1186/1479-5868-11-64), 2014-05-16
Supplement: 1479-5868-11-64-S1.pdf [file 1479-5868-11-64-S1.pdf]

**Additional File 1** - Main features of the three interventional diets

| Component     | Diet                          |                               |                   |
|---------------|-------------------------------|-------------------------------|-------------------|
|               | CSIRO                         | MED                           | SB                |
| Energy        | kJ restricted (6000 kJ / day) | kJ restricted (6000 kJ / day) | <i>ad libitum</i> |
| Carbohydrate  | **                            | ***                           | *                 |
| Protein       | ***                           | **                            | ***               |
| Fat           | *                             | ***                           | ***               |
| Saturated fat | *                             | *                             | *                 |

\* indicates 'low'; \*\* indicates 'moderate'; \*\*\* indicates 'high'. Assignment of 'low', 'moderate' and 'high' are relative qualitative comparators between the three diets and not necessarily quantitative indications of amounts provided by the respective diet. CSIRO, CSIRO Diet; MED, Mediterranean Diet; SB, South Beach Diet.
