# Supplementary material for: Patient freedom to choose a weight loss diet in the treatment of overweight and obesity: a randomized dietary intervention in type 2 diabetes and pre-diabetes
Source: PubMed Central journal article supplement (PMC4035903; doi:10.1186/1479-5868-11-64), 2014-05-16

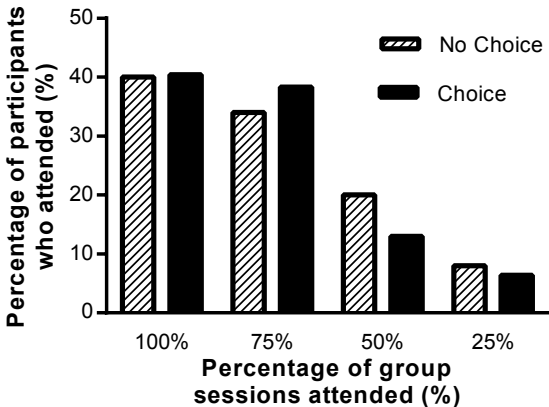

Supplement: 1479-5868-11-64-S2.pdf [file 1479-5868-11-64-S2.pdf]
